Tondabayashi, Japan, <sup>5</sup>Matsushita Kids' Clinic, Kadoma, Japan, <sup>6</sup>Kubota Children's Clinic, Osaka, Japan, <sup>7</sup>Yagi Pediatric Clinic, Yao, Japan, <sup>8</sup>Takechi Clinic for Pediatrics & Internal Medicine, Osaka, Japan, <sup>9</sup>Takasaki Pediatric Clinic, Fukuoka, Japan, <sup>10</sup>Shindo Children's Clinic, Fukuoka, Japan, <sup>11</sup>Yamashita Pediatric Clinic, Itoshima, Japan, <sup>12</sup>Yokoyama Children's Clinic, Kasuga, Japan, <sup>13</sup>Kiyomatsu Pediatric Clinic, Fukuoka, Japan, <sup>14</sup>Administration division, Osaka City University Hospital, Osaka, Japan, <sup>15</sup>Clinical Epidemiology Research Center, Medical Co. LTA (SOUSEIKAI), Fukuoka, Japan, <sup>16</sup>College of Healthcare Management, Miyama, Japan

**Background:** Evidence is limited for influenza vaccine effectiveness (VE) against laboratory-confirmed influenza among young children. Using test-negative design (a modified case-control study) which minimizes confounding by health care-seeking behavior and misclassification of diseases, we aimed to monitor influenza VE among young children in Japan where all approved influenza vaccines are egg-propagated, inactivated formulations (IIV).

**Methods:** For seasons spanning 2013-14 to 2017-18 in Osaka and Fukuoka Prefectures, Japan, we employed prospective, active, and systematic recruitment of children aged <6 years who visited collaborating pediatric clinics within 7 days of influenza-like illness onset. Nasal aspirates were tested for influenza by real-time RT-PCR. Date of vaccination was confirmed by medical records or maternal and child health handbooks. Cases and controls were defined as being PCR-positive and -negative, respectively. Conditional logistic regression models were used to calculate adjusted VE ( $[1 - \text{adjusted odds ratio}] \times 100\%$ ).

**Results:** We analyzed 4,614 subjects including 1,917 cases. VEs of IIV with 2 doses approximated 50%, ranging from 41% (95% confidence interval [CI]: 14 % to 60%) in 2016-17 season to 63% (95% CI: 45% to 76%) in 2017-18 season. Significant VEs were also shown for predominant circulating strains every season, irrespective of their antigenic match to vaccine strains (56% and 65% for A[H1N1]pdm, 37% and 50% for A[H3N2], and 60% for B[Yamagata]).

**Conclusions:** IIV provided modest and significant protection against laboratory-confirmed influenza in young Japanese children.

**Key messages:** Test-negative design is useful for monitoring influenza VE.

## Abstract #: 681

### Influenza vaccine effectiveness in young Japanese children over five seasons

Wakaba Fukushima<sup>1,2</sup>, Saeko Morikawa<sup>3</sup>, Masashi Fujioka<sup>4</sup>, Tohru Matsushita<sup>5</sup>, Megumi Kubota<sup>6</sup>, Yoshina Yagi<sup>7</sup>, Tetsuhisa Takechi<sup>8</sup>, Yoshio Takasaki<sup>9</sup>, Shizuo Shindo<sup>10</sup>, Yuji Yamashita<sup>11</sup>, Takato Yokoyama<sup>12</sup>, Yumi Kiyomatsu<sup>13</sup>, Satoshi Hiroi<sup>3</sup>, Keiko Nakata<sup>3</sup>, Kazuhiro Matsumoto<sup>1</sup>, Akiko Maeda<sup>1</sup>, Kyoko Kondo<sup>14</sup>, Kazuya Ito<sup>1,2,15,16</sup>, Tetsuo Kase<sup>1,2</sup>, Satoko Ohfuji<sup>1,2</sup>, Yoshio Hirota<sup>15,16</sup>

<sup>1</sup>Department of Public Health, Osaka City University Graduate School of Medicine, Osaka, Japan, <sup>2</sup>Research Center for Infectious Disease Sciences, Osaka City University Graduate School of Medicine, Osaka, Japan, <sup>3</sup>Department of Virology, Osaka Institute of Public Health, Osaka, Japan, <sup>4</sup>Fujioka Pediatric Clinic,
